# Supplementary material for: Fluorescent DNA–poly(phenylenevinylene) hybrid hydrogels for monitoring drug release
Source: Royal Society of Chemistry journal article supplement (doi:10.1039/b817788k), 2008-12-01
Supplement: b817788k.pdf [file b817788k.pdf]

## Supporting Information

### Fluorescent DNA-Poly(phenylenevinylene) Hybrid Hydrogels for Monitoring Drug Release

Hongwei Tang, Xinrui Duan, Xuli Feng, Libing Liu, Shu Wang\*, Yuliang Li and Daoben Zhu

Beijing National Laboratory for Molecular Sciences, Key Laboratory of Organic Solids,

Institute of Chemistry, Chinese Academy of Sciences, Beijing, 100190, P. R. China.

#### Materials and Measurements.

Sodium salt of DNA from salmon tests was purchased from Sigma-Adrich. Ethyl 2-(4-methoxyphenoxy) acetate (1) was synthesized according to literature.<sup>1</sup> Fluorescence spectra were obtained from a Hitachi F-4500 fluorometer using a Xeron-lamp as the excitation source. Circular dichroism spectra were performed on JASCO J-815 spectropolarimeter. Images of scanning electron microscopy (SEM) were taken on Hitachi S-4300 scanning electron microscopy. The photographs were obtained by Canon digital camera. Fluorescent microscope images were taken on Olympus IX-71 with Hg-lamp as excitation source and GFP fluorescence filter cube. The water was purified using a Millipore filtration system.

#### Synthesis of monomer

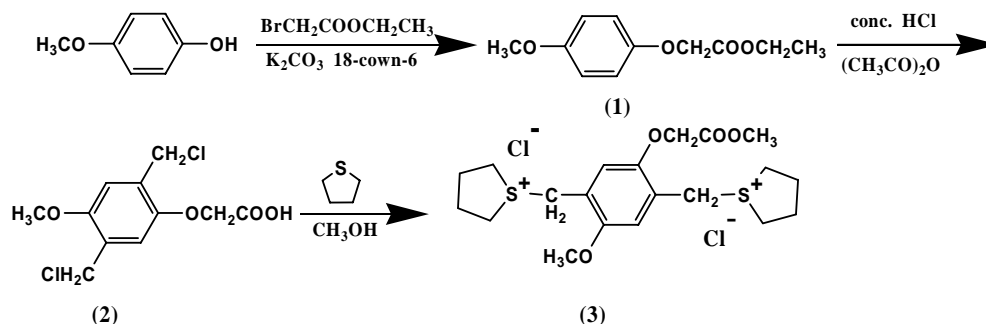

**Scheme S1.** The synthesis route of PPV monomer.

## **2-(2,5-Bis(chloromethyl)-4-methoxyphenoxy)acetic acid (2)**

To a stirred mixture of ethyl 2-(4-methoxyphenoxy) acetate (1.35 g, 6.4 mmol) and paraformaldehyde (0.53 g, 18 mmol) was dropwisely added 3.1 mL of concentrated HCl under N<sub>2</sub> atmosphere. Subsequently, acetic anhydride (6.2 mL) was added at such a rate that the temperature did not exceed 70 °C and the resulting solution was stirred at 60 °C for 3h. Then the solution was cooled down to room temperature and poured into 20 mL of water. The resulting precipitate was filtered off, dissolved in CH<sub>2</sub>Cl<sub>2</sub> (20 mL) and dried over anhydrous MgSO<sub>4</sub>. Evaporation of the solvent gave a white solid in 74.4% yield. <sup>1</sup>H NMR (400 MHz, DMSO-*d*<sub>6</sub>): δ = 12.97 (s, 1H), 7.14 (s, 1H), 7.10 (s, 1H), 4.76 (s, 2H), 4.71 (s, 2H), 4.66 (s, 2H), 3.80 (s, 3H); <sup>13</sup>C NMR (100 MHz, DMSO-*d*<sub>6</sub>): δ = 170.8, 152.0, 150.0, 128.0, 127.1, 116.0, 114.4, 67.6, 56.6.

## **Bis-tetrahydrothiophenium salt of 6-(2,5-bischloromethyl-4-methoxy-phenoxy)-acetic acid methyl ester (3)**

To a solution of **2** (0.33 g, 1.2 mmol) in 4 mL of methanol, was added 0.4 mL tetrahydrothiophene. The mixture was allowed to react at 50 °C for 14h, and then was cooled down to room temperature. The solution was poured into cold acetone and the resulting precipitate was filtered off to afford a white solid (0.19 g, 33% yield). <sup>1</sup>H NMR (400 MHz, D<sub>2</sub>O): δ = 7.21 (s, 1H), 7.08 (s, 1H), 4.91 (s, 2H), 4.57 (s, 2H), 4.47(s, 2H), 3.89 (s, 3H), 3.79 (s, 3H), 3.50-3.39 (m, 8H), 3.37-2.26 (m, 8H); <sup>13</sup>C NMR (100 MHz, CD<sub>3</sub>OD): δ = 169.5, 152.9, 150.5, 121.0, 118.6, 116.6, 115.4, 65.5, 57.3, 51.6, 46.9, 41.6 28.5. MS (ESI): 199.3 (M-2Cl)<sup>2+</sup>.

## **Synthesis of DNA hydrogels**

To a solution of salmon DNA (13.2 mg, 20 μmol/base pair) in 1.0 mL water were added 2 mL of dimethylsulfoxide and 375 μL of 0.04 M monomer aqueous solution. Then 40 μL of 1.0 M NaOH was added under continuous stirring and the mixture was allowed to react at 25°C for 40 min. After reaction, the solution was poured into acetone, centrifugated and dried under vacuum to obtain the dry **Gel 2** (17 mg). The other three hydrogels (**Gel 1**, **Gel 3** and **Gel 4**) were synthesized under the same condition except for using 0.5, 1.0 and 1.25 as feed molar ratio of monomer to DNA instead of 0.75.

### Measurement of swelling degrees

The dry DNA–PPV hydrogels (**Gel 1-4**) were placed in water at room temperature for 12h, and then swelling degrees ( $Q$ ) were measured according to following equation:<sup>2</sup>

$$Q = (W_{\text{wet}} - W_{\text{dry}})/W_{\text{dry}}$$

where  $W_{\text{dry}}$  and  $W_{\text{wet}}$  are the weight of the dried hydrogel and wet hydrogel, respectively.

### Digestion of DNA–ppv hydrogel with DNase I

The DNA (30 $\mu$ g/100 $\mu$ L) and DNA–PPV hydrogel were placed in buffer (40mM Tris-HCl, pH 7.5, 10mM  $\text{Mn}^{2+}$ ) containing 5mM dithiothreitol, respectively. Then DNase I (final concentration was 1U/100 $\mu$ L) was added and allowed to digest at 37°C for 15min. The digestive products were allowed to take gel electrophoresis by using 1% agarose gel in the electrolyte of 1X TAE buffer with voltage of 100 V for 30 min. Tiangen 1 kb DNA marker was used. The volume of sample for gel electrophoresis was 6 $\mu$ L.

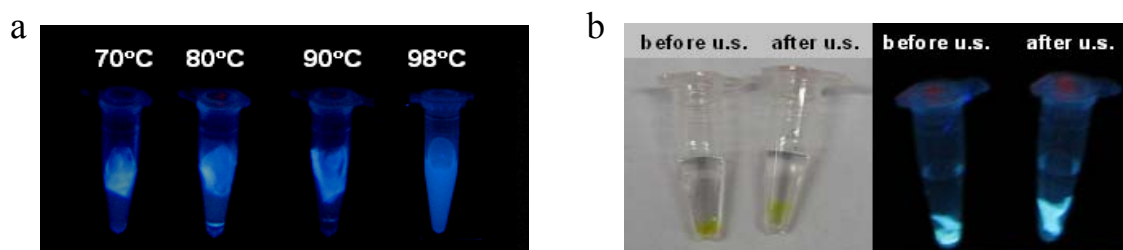

**Figure S1.** Effects of temperature and ultrasound upon Gel 2. (a) Photographs of **Gel 2** treated at different temperatures under UV transilluminator with excitation at 365 nm. (b) Photographs of **Gel 2** before and after treatment under ultrasound. Right one was taken under UV transilluminator with excitation at 365 nm.

### Reference

1. Benjamin, I.; Hong, H.; Avny, Y.; Davidov, D.; Neumann, R. *J. Mater. Chem.* **1998**, *8*, 919-924.
2. Ono, T.; Sugimoto, T.; Shinkai, S.; Sada, K. *Nat. Mater.* **2007**, *6*, 429.
